# Supplementary material for: Mechanism of Iron-Dependent Repressor (IdeR) Activation and DNA Binding: A Molecular Dynamics and Protein Structure Network Study
Source: PubMed Central journal article supplement (PMC4689551; doi:10.1371/journal.pcbi.1004500), 2015-12-23
Supplement: pcbi.1004500.s003.pdf [file pcbi.1004500.s003.pdf]

S3\_Text: Supplementary tables

Table A Partial charges on non hydrogen atoms of the metal binding residues before and after *ab-initio* calculations

| <u>Residue name</u> | <u>Atom</u> | <u>AMBER charge</u> | <u>MS1 charge</u> |               | <u>MS2 charge</u> |
|---------------------|-------------|---------------------|-------------------|---------------|-------------------|
|                     |             |                     | <i>HIS79</i>      | <i>HIS98</i>  | <i>HIS106</i>     |
| <i>HIS</i>          | N           | -0.42               | -0.42             | -0.42         | -0.42             |
|                     | CA          | 0.02                | 0.02              | 0.02          | 0.02              |
|                     | CB          | -0.05               | 0.10              | 0.32          | -0.22             |
|                     | CG          | -0.03               | -0.14             | 0.08          | 0.03              |
|                     | ND1         | -0.38               | -0.09             | -0.23         | -0.13             |
|                     | CE1         | 0.21                | -0.15             | -0.15         | -0.06             |
|                     | NE2         | -0.57               | -0.12             | -0.17         | -0.08             |
|                     | CD2         | 0.13                | -0.02             | -0.16         | -0.13             |
|                     | C           | 0.60                | 0.60              | 0.60          | 0.60              |
|                     | O           | -0.57               | -0.57             | -0.57         | -0.57             |
|                     |             |                     | <i>GLU83</i>      | <i>GLU172</i> | <i>GLU105</i>     |
| <i>GLU</i>          | N           | -0.52               | -0.52             | -0.52         | -0.52             |
|                     | CA          | 0.04                | 0.04              | 0.04          | 0.04              |
|                     | CB          | 0.06                | 0.25              | 0.25          | -0.10             |
|                     | CG          | 0.01                | -0.05             | -0.05         | 0.16              |
|                     | CD          | 0.81                | 0.57              | 0.57          | 0.56              |
|                     | OE1         | -0.82               | -0.62             | -0.62         | -0.56             |
|                     | OE2         | -0.82               | -0.62             | -0.62         | -0.56             |
|                     | C           | 0.54                | 0.54              | 0.54          | 0.54              |
|                     | O           | -0.58               | -0.58             | -0.58         | -0.58             |
|                     |             |                     | <i>GLN175</i>     |               |                   |
| <i>GLN</i>          | N           | -0.42               | -0.42             |               |                   |
|                     | CA          | 0.00                | 0.00              |               |                   |
|                     | CB          | 0.00                | 0.00              |               |                   |
|                     | CG          | -0.06               | 0.00              |               |                   |
|                     | CD          | 0.70                | 0.22              |               |                   |
|                     | OE1         | -0.61               | -0.24             |               |                   |
|                     | NE2         | -0.94               | -0.59             |               |                   |
|                     | C           | 0.60                | 0.60              |               |                   |
|                     | O           | -0.57               | -0.57             |               |                   |

|                   |    |       |      |  |                      |
|-------------------|----|-------|------|--|----------------------|
|                   |    |       |      |  | <b><i>MET10</i></b>  |
| <b><i>MET</i></b> | N  | -0.42 |      |  | -0.42                |
|                   | CA | -0.02 |      |  | -0.02                |
|                   | CB | 0.03  |      |  | 0.04                 |
|                   | CG | 0.00  |      |  | 0.04                 |
|                   | SD | -0.27 |      |  | 0.08                 |
|                   | CE | -0.05 |      |  | -0.05                |
|                   | C  | 0.60  |      |  | 0.60                 |
|                   | O  | -0.57 |      |  | -0.57                |
|                   |    |       |      |  | <b><i>CYS102</i></b> |
| <b><i>CYS</i></b> | N  | -0.42 |      |  | -0.42                |
|                   | CA | 0.04  |      |  | 0.04                 |
|                   | CB | -0.08 |      |  | -0.18                |
|                   | SG | -0.11 |      |  | -0.46                |
|                   | C  | 0.60  |      |  | 0.60                 |
|                   | O  | -0.57 |      |  | -0.30                |
| <b><i>HOH</i></b> | O  | -1    |      |  | -0.81                |
| <b><i>FE</i></b>  | FE | 2     | 0.92 |  | 0.46                 |

**Table B Molecular Dynamics Protocol**

| <b><u>Parameters</u></b>   | <b><u>MD protocol</u></b>                          |
|----------------------------|----------------------------------------------------|
| Time step for integration  | 2fs                                                |
| Temperature                | 300K                                               |
| Temperature coupling       | Langevin dynamics                                  |
| Pressure                   | 1 bar                                              |
| Electrostatic Interactions | Particle mesh Ewald                                |
| Water model                | TIP3P                                              |
| Force Field                | ff99SB                                             |
| Metal ion force field      | Modified using MCPB                                |
| Size of cubic box          | 12 Å away from the farthest atom in all directions |
| Minimization               | 500 steps [SD] + 2500 steps [CG]                   |
| Equilibration              | 20ps + 50ps + 50ps = 120 ps                        |
| Length of production run   | 100 ns                                             |

**Table C: List of dynamically stable hydrogen bonds between protein subunits and DNA.**

| System       | Chain A |         |      | Chain B       |               |             | Chain C |         |                | Chain D       |             |      |
|--------------|---------|---------|------|---------------|---------------|-------------|---------|---------|----------------|---------------|-------------|------|
|              | DNA     | Protein | %O   | DNA           | Protein       | %O          | DNA     | Protein | %O             | DNA           | Protein     | %O   |
| <i>FU-nm</i> | 10/O2P  | 28/N    | 99.3 |               |               |             | 13'/O2P | 60/NH1  | 71.9           | 5/O1P         | 27/NH2      | 94.7 |
|              | 10/O1P  | 27/NH2  | 98.4 |               |               |             | 13'/O2P | 60/NE   | 59.1           | 24'/O2P       | 37/OG       | 84.0 |
|              | 9/O1P   | 29/NH1  | 93.9 |               |               |             |         |         |                | 5/O1P         | 27/NE       | 79.7 |
|              | 9/O2P   | 29/NH2  | 90.5 |               |               |             |         |         |                | 24'/O2P       | 40/OG1      | 66.3 |
|              | 10/O1P  | 27/NE   | 75.0 |               |               |             |         |         |                | 4/O2P         | 29/NH1      | 53.5 |
|              | 17'/O2P | 43/NE2  | 69.4 |               |               |             |         |         |                | 6/O2P         | 42/OG       | 53.3 |
|              | 18'/O2P | 47/NH2  | 65.6 |               |               |             |         |         |                | 22'/O2P       | 47/NH2      | 53.1 |
|              | 17'/O2P | 47/NH1  | 62.0 |               |               |             |         |         |                |               |             |      |
|              | 11/O2P  | 27/NH2  | 53.6 |               |               |             |         |         |                |               |             |      |
|              | 17'/O2P | 50/NH2  | 51.8 |               |               |             |         |         |                |               |             |      |
| <i>FU-m</i>  |         |         |      |               |               |             |         |         |                |               |             |      |
|              | 18'/O2P | 7/OG1   | 62.5 | 20/O2P        | 7/OG1         | 73.5        | 13'/O1P | 27/NH2  | 99.6           | 23'/O2P       | 11/OH       | 99.7 |
|              | 17'/O1P | 7/N     | 58.3 | 21/O2P        | 37/N          | 63.0        | 16/O2P  | 37/OG   | 95.1           | 24'/O2P       | 37/OG       | 99.7 |
|              | 11/O2P  | 27/NH1  | 55.1 | 21/O2P        | 37/OG         | 62.5        | 12'/O1P | 29/NH1  | 81.2           | 5/O1P         | 27/NH2      | 99.7 |
|              | 17'/O2P | 8/OG1   | 53.6 | <i>*20/N4</i> | <i>43/OE1</i> | <i>56.7</i> | 13'/O1P | 27/NE   | 76.3           | 22'/O2P       | 47/NH1      | 95.4 |
|              |         |         |      | 20/O2P        | 36/NE2        | 56.5        | 12'/O2P | 29/NE   | 74.2           | 4/O2P         | 29/NH2      | 78.5 |
|              |         |         |      | 21/O2P        | 40/OG1        | 55.4        | 16/O2P  | 40/OG1  | 72.1           | 4/O1P         | 29/NH1      | 78.0 |
|              |         |         |      |               |               |             | 14/O1P  | 7/OG1   | 52.7           | 24'/O2P       | 40/OG1      | 76.6 |
|              |         |         |      |               |               |             |         |         | <i>*23'/N7</i> | <i>43/NE2</i> | <i>71.7</i> |      |

\* Hydrogen bonds involving DNA bases are marked in red and italicized. All other hydrogen bonds are formed between the phosphate group of DNA and protein residue.

%O represents percentage occupancy of the hydrogen bonds.

**Table D List of residues forming dynamically stable clusters in the protein-DNA bipartite network**

|              | Chain A                   | Chain B   | Chain C                       | Chain D                  |
|--------------|---------------------------|-----------|-------------------------------|--------------------------|
| <i>FU-nm</i> | d12 40 d19' 39<br>d20' 37 | 60 d8' 27 | 28 60 d12'                    | d7 d24' 37 d25' 39<br>d6 |
|              | 28 27 d10 60 d9 26        |           | 29 d14' 27 28 d13'<br>60 d12' | 36 40 d23'               |

|             |                                           |                                       |                                         |                                          |
|-------------|-------------------------------------------|---------------------------------------|-----------------------------------------|------------------------------------------|
|             | d19' 40 44 43 50<br>d17' 47 d18' <u>7</u> |                                       |                                         | 27 42 d5                                 |
|             | 60 d11 27 d10 28<br>29 d9 26              |                                       |                                         | 26 42 d6 27 d5 28<br>29 d4               |
|             |                                           |                                       |                                         | <u>7</u> 37 40 d24' 36<br>d23'           |
| <b>FU-m</b> | d19' 43 d18' 40                           | 43 d20 40 d21 39<br>d22 37            | d15' 39 d17 37 d16<br>40 d15            | d7 d22' 43 d23' 40<br>d24' 37 d25' 39 d6 |
|             | 47 d16' <u>8</u>                          | 36 40 d20 <u>2</u>                    | 26 28 27 d13' 60<br>d12'                | 26 28 27 d5 60 d4                        |
|             | 60 d10 27                                 | <u>7</u> 37 40 d21 36 d20<br><u>2</u> | 36 40 d15                               | 36 40 d23'                               |
|             | <u>7</u> d17' <u>2</u>                    | 50 d18 47 d19 <u>8</u>                | 37 40 d16 36 d15 <u>7</u><br>d14 47 d13 | <u>2 4 7</u> 11 37 39 d24'<br>36 d23'    |
|             | <u>6</u> d18' <u>7 8</u> 47 d17' <u>2</u> | 60 d8' 27                             | 60 d14' 27 28 d13'<br>26 29 d12'        | 60 d6 27 28 d5 26<br>29 d4               |
|             | 60 d10 d11 27                             |                                       |                                         | 43 47 d22'                               |

\* Network are generated at MEC = 2%. Cluster colours represent the different clusters obtained from bipartite network from different DNA entities, blue [nucleobases], green [deoxyribose sugar] and phosphate [orange]. Bold and underlined residues represent the N-terminal region. Also, note that DNA residues have a prefix 'd'.

**Table E Top 20 protein-DNA pairs that contribute maximally to the free energy contribution in FU-nm and FU-m.**

| FU-nm      |            |                | FU-m       |            |                |
|------------|------------|----------------|------------|------------|----------------|
| DNA        | P          | E (kcal/mol)   | DNA        | P          | E (kcal/mol)   |
| <b>10</b>  | <b>27A</b> | <b>-20.903</b> | <b>5</b>   | <b>27D</b> | <b>-21.594</b> |
| <b>13'</b> | <b>27C</b> | <b>-20.877</b> | <b>13'</b> | <b>27C</b> | <b>-20.080</b> |
| <b>5</b>   | <b>27D</b> | <b>-16.351</b> | <b>4</b>   | <b>29D</b> | <b>-13.838</b> |
| <b>17'</b> | <b>50A</b> | <b>-15.320</b> | <b>5</b>   | <b>29C</b> | <b>-12.468</b> |
| <b>17'</b> | <b>47A</b> | <b>-14.580</b> | <b>17'</b> | <b>47A</b> | <b>-12.240</b> |
| <b>4</b>   | <b>29D</b> | <b>-12.808</b> | <b>13'</b> | <b>60C</b> | <b>-12.227</b> |
| <b>9</b>   | <b>29A</b> | <b>-12.154</b> | <b>19</b>  | <b>47B</b> | <b>-11.606</b> |
| <b>7'</b>  | <b>27B</b> | <b>-11.849</b> | <b>7'</b>  | <b>27B</b> | <b>-11.179</b> |
| <b>22'</b> | <b>47D</b> | <b>-11.377</b> | <b>14</b>  | <b>47C</b> | <b>-10.754</b> |
| <b>13'</b> | <b>60C</b> | <b>-10.501</b> | <b>15'</b> | <b>50A</b> | <b>-10.552</b> |
| <b>24'</b> | <b>37D</b> | <b>-10.339</b> | <b>22'</b> | <b>47D</b> | <b>-10.021</b> |
| <b>8'</b>  | <b>60B</b> | <b>-9.723</b>  | <b>10</b>  | <b>60A</b> | <b>-9.389</b>  |
| <b>11</b>  | <b>27A</b> | <b>-9.130</b>  | <b>18</b>  | <b>50B</b> | <b>-9.276</b>  |
| <b>18'</b> | <b>47A</b> | <b>-8.848</b>  | <b>24'</b> | <b>37D</b> | <b>-8.775</b>  |

|     |     |        |     |     |        |
|-----|-----|--------|-----|-----|--------|
| 12' | 60C | -8.205 | 10  | 27A | -8.525 |
| 12' | 27A | -8.050 | 11  | 27A | -8.393 |
| 11' | 29C | -7.616 | 5   | 60D | -8.373 |
| 6   | 27D | -7.362 | 16  | 37C | -7.700 |
| 24' | 26D | -6.972 | 14' | 60C | -6.595 |
| 24' | 13D | -6.672 | 17' | 7A  | -6.563 |

\* Pairs are coloured based on protein residue location in the DNA binding domain. Orange represents protein residues from the 2nd helix, blue represents residues from the DBHs and red for N-terminal residues.

**Table F Mean and standard deviation values of the different parameters used to monitor the geometry of the metal center. Values are provided for individual subunit of all the metallated system studied (M1, M2, D-m and FU). Standard deviation is calculated over all the snapshots. The distance values are compared to experimental values obtained from (Feese *et.al.* J Biol Chem. 2001;276(8):5959-66 and Wisedchaisri G *et.al.* Journal of molecular biology. 2004;342(4):1155-69), representing the crystal structures IFX7 and 1U8R. Mean and standard deviation of these values are obtained from individual monomeric subunits of the crystal structure as provided in the literature. The angles are compared to expected values (text book) of the given geometry (distorted trigonal bipyramidal geometry for MS1 and octahedral geometry for MS2).**

| Parameter                                            | M1        | M2        | Dm-A      | Dm-B      | FU-A      | FU-B      | FU-C      | FU-D      | Known     |
|------------------------------------------------------|-----------|-----------|-----------|-----------|-----------|-----------|-----------|-----------|-----------|
| <i>Distance between Fe and coordinating ligands</i>  |           |           |           |           |           |           |           |           |           |
| Fe-79@NE2                                            | 2.05±0.06 | 2.07±0.06 | 2.08±0.06 | 2.05±0.06 | 2.08±0.06 | 2.05±0.06 | 2.07±0.06 | 2.07±0.06 | 2.05±0.10 |
| Fe-83@OE2                                            | 1.99±0.06 | 1.99±0.06 | 1.98±0.06 | 1.99±0.06 | 1.98±0.06 | 1.99±0.06 | 1.99±0.06 | 1.98±0.06 | 1.99±0.10 |
| Fe-98@ND1                                            | 2.06±0.06 | 2.07±0.05 | 2.07±0.06 | 2.06±0.06 | 2.07±0.06 | 2.06±0.06 | 2.06±0.06 | 2.06±0.06 | 2.07±0.09 |
| Fe-172@OE1                                           | 2.05±0.06 | 2.04±0.06 | 2.01±0.07 | 2.04±0.06 | 2.00±0.06 | 2.02±0.06 | 2.03±0.06 | 1.99±0.06 | 1.92±0.11 |
| Fe-175@OE1                                           | 2.02±0.06 | 2.03±0.06 | 2.00±0.06 | 2.01±0.07 | 2.01±0.06 | 2.01±0.06 | 2.00±0.06 | 2.01±0.07 | 1.94±0.14 |
| Fe-10@SD                                             | NA        | 2.37±0.06 | 2.39±0.07 | 2.39±0.06 | 2.39±0.07 | 2.37±0.06 | 2.39±0.06 | 2.39±0.06 | 2.32±0.11 |
| Fe-102@O                                             | NA        | 1.83±0.06 | 1.83±0.06 | 1.83±0.06 | 1.83±0.06 | 1.83±0.06 | 1.84±0.06 | 1.84±0.06 | 2.06±0.13 |
| Fe-102@SG                                            | NA        | 2.19±0.07 | 2.18±0.07 | 2.19±0.07 | 2.18±0.07 | 2.19±0.06 | 2.19±0.07 | 2.18±0.07 | 2.88±0.30 |
| Fe-105@OE1                                           | NA        | 1.98±0.06 | 1.96±0.06 | 1.97±0.06 | 1.96±0.06 | 1.96±0.06 | 1.97±0.06 | 1.97±0.06 | 1.97±0.08 |
| Fe-106@NE2                                           | NA        | 2.13±0.06 | 2.14±0.06 | 2.14±0.06 | 2.15±0.06 | 2.14±0.06 | 2.14±0.06 | 2.13±0.06 | 2.13±0.07 |
| <i>Angle between Fe and two coordinating ligands</i> |           |           |           |           |           |           |           |           |           |
| 98@ND1-Fe-172@OE1                                    | 89.3±2.49 | 89.4±2.53 | 87.0±3.07 | 88.5±2.69 | 85.8±2.61 | 88.5±2.66 | 89.2±2.84 | 89.2±2.84 | ~90       |
| 172@OE1-Fe-79@NE2                                    | 87.0±2.96 | 88.9±3.13 | 92.2±3.47 | 88.6±3.39 | 92.7±3.30 | 87.8±3.23 | 89.1±3.33 | 92.2±3.02 | ~90       |

|                    |           |           |           |           |           |           |           |           |      |
|--------------------|-----------|-----------|-----------|-----------|-----------|-----------|-----------|-----------|------|
| 79@NE2-Fe-83@OE2   | 89.5±2.58 | 90.1±2.76 | 91.6±2.73 | 90.3±2.80 | 92.1±2.53 | 90.3±2.74 | 90.9±2.78 | 91.8±2.61 | ~90  |
| 83@OE2-Fe-175@OE1  | 90.4±2.93 | 89.2±2.94 | 90.3±2.90 | 90.2±2.99 | 90.4±2.89 | 90.4±2.98 | 90.0±2.89 | 90.2±2.94 | ~90  |
| 175@OE1-Fe-98@ND1  | 130.5±2.3 | 130.9±2.2 | 131.2±2.4 | 130.6±2.3 | 131.6±2.3 | 130.1±2.2 | 130.3±2.3 | 131.4±2.3 | ~120 |
| 105@OE2-Fe-106@NE2 | NA        | 76.8±2.52 | 78.0±3.88 | 76.5±2.57 | 76.6±2.79 | 76.4±2.59 | 76.3±2.55 | 76.6±2.62 | ~90  |
| 106@NE2-Fe-102@O   | NA        | 80.6±2.49 | 80.9±2.54 | 80.6±2.43 | 80.2±2.44 | 80.1±2.40 | 79.8±2.47 | 80.7±2.49 | ~90  |
| 102@O-Fe-102@SG    | NA        | 107.3±2.6 | 107.6±2.8 | 107.0±2.6 | 106.8±2.6 | 107.4±2.5 | 107.2±2.6 | 107.1±2.8 | ~90  |

**Table G**

**Coordinates of the metal centers used to generate the electrostatic parameters using MCPB.**

**Metal Site1 sidechain model for force constants:**

REMARK

|      |      |     |     |   |        |        |        |
|------|------|-----|-----|---|--------|--------|--------|
| ATOM | 627  | CB  | HIF | 1 | 6.261  | 41.034 | 3.476  |
| ATOM | 628  | CG  | HIF | 1 | 5.188  | 41.773 | 2.727  |
| ATOM | 629  | ND1 | HIF | 1 | 4.801  | 43.044 | 3.085  |
| ATOM | 630  | CD2 | HIF | 1 | 4.441  | 41.427 | 1.654  |
| ATOM | 631  | CE1 | HIF | 1 | 3.847  | 43.454 | 2.266  |
| ATOM | 632  | NE2 | HIF | 1 | 3.621  | 42.494 | 1.389  |
| ATOM | 2415 | HB2 | HIF | 1 | 7.021  | 41.755 | 3.778  |
| ATOM | 2416 | HB3 | HIF | 1 | 6.703  | 40.302 | 2.800  |
| ATOM | 2417 | HD1 | HIF | 1 | 5.178  | 43.586 | 3.849  |
| ATOM | 2418 | HE1 | HIF | 1 | 3.402  | 44.440 | 2.398  |
| ATOM | 2419 | HD2 | HIF | 1 | 4.390  | 40.533 | 1.032  |
| ATOM | 661  | CB  | GLF | 2 | 0.120  | 38.748 | 2.987  |
| ATOM | 662  | CG  | GLF | 2 | 0.586  | 40.176 | 2.719  |
| ATOM | 663  | CD  | GLF | 2 | 1.075  | 40.440 | 1.316  |
| ATOM | 664  | OE1 | GLF | 2 | 1.603  | 39.502 | 0.685  |
| ATOM | 665  | OE2 | GLF | 2 | 0.964  | 41.577 | 0.806  |
| ATOM | 2451 | HB2 | GLF | 2 | 0.947  | 38.072 | 2.771  |
| ATOM | 2452 | HB3 | GLF | 2 | -0.712 | 38.528 | 2.319  |
| ATOM | 2453 | HG2 | GLF | 2 | -0.239 | 40.867 | 2.895  |
| ATOM | 2454 | HG3 | GLF | 2 | 1.413  | 40.420 | 3.386  |
| ATOM | 785  | CB  | HIM | 3 | -0.523 | 44.821 | 0.179  |
| ATOM | 786  | CG  | HIM | 3 | 0.820  | 45.444 | -0.116 |
| ATOM | 787  | ND1 | HIM | 3 | 1.967  | 44.704 | -0.160 |
| ATOM | 788  | CD2 | HIM | 3 | 1.155  | 46.741 | -0.348 |
| ATOM | 789  | CE1 | HIM | 3 | 2.985  | 45.518 | -0.417 |
| ATOM | 790  | NE2 | HIM | 3 | 2.512  | 46.756 | -0.539 |
| ATOM | 2577 | HB2 | HIM | 3 | -0.624 | 43.888 | -0.375 |
| ATOM | 2578 | HB3 | HIM | 3 | -1.318 | 45.506 | -0.115 |

|      |      |      |     |    |        |        |        |
|------|------|------|-----|----|--------|--------|--------|
| ATOM | 2579 | HE1  | HIM | 3  | 3.997  | 45.119 | -0.492 |
| ATOM | 2580 | HE2  | HIM | 3  | 3.071  | 47.573 | -0.741 |
| ATOM | 2581 | HD2  | HIM | 3  | 0.587  | 47.670 | -0.402 |
| ATOM | 1340 | CB   | GLM | 4  | 5.396  | 44.105 | -3.202 |
| ATOM | 1341 | CG   | GLM | 4  | 5.831  | 42.753 | -2.638 |
| ATOM | 1342 | CD   | GLM | 4  | 4.678  | 41.969 | -2.022 |
| ATOM | 1343 | OE1  | GLM | 4  | 3.643  | 42.572 | -1.668 |
| ATOM | 1344 | OE2  | GLM | 4  | 4.767  | 40.735 | -1.923 |
| ATOM | 3134 | HB2  | GLM | 4  | 6.273  | 44.585 | -3.637 |
| ATOM | 3135 | HB3  | GLM | 4  | 5.024  | 44.709 | -2.375 |
| ATOM | 3136 | HG2  | GLM | 4  | 6.256  | 42.145 | -3.437 |
| ATOM | 3137 | HG3  | GLM | 4  | 6.580  | 42.907 | -1.861 |
| ATOM | 1366 | CB   | GLC | 5  | 0.188  | 44.691 | -3.464 |
| ATOM | 1367 | CG   | GLC | 5  | 0.083  | 43.242 | -3.885 |
| ATOM | 1368 | CD   | GLC | 5  | 0.852  | 42.315 | -2.959 |
| ATOM | 1369 | OE1  | GLC | 5  | 0.810  | 42.457 | -1.747 |
| ATOM | 1370 | NE2  | GLC | 5  | 1.565  | 41.359 | -3.532 |
| ATOM | 3156 | HB2  | GLC | 5  | 1.250  | 44.888 | -3.315 |
| ATOM | 3157 | HB3  | GLC | 5  | -0.333 | 44.769 | -2.510 |
| ATOM | 3158 | HG2  | GLC | 5  | -0.963 | 42.935 | -3.876 |
| ATOM | 3159 | HG3  | GLC | 5  | 0.487  | 43.125 | -4.891 |
| ATOM | 3160 | HE21 | GLC | 5  | 2.096  | 40.717 | -2.960 |
| ATOM | 3161 | HE22 | GLC | 5  | 1.575  | 41.275 | -4.538 |
| ATOM | 1779 | FE   | FE1 | 6  | 2.243  | 42.623 | -0.240 |
| ATOM | 54   | C    | CH3 | 7  | 5.687  | 40.325 | 4.716  |
| ATOM | 55   | H1   | CH3 | 7  | 6.484  | 39.801 | 5.236  |
| ATOM | 56   | H2   | CH3 | 7  | 4.928  | 39.613 | 4.408  |
| ATOM | 57   | H3   | CH3 | 7  | 5.244  | 41.060 | 5.382  |
| ATOM | 58   | C    | CH3 | 8  | -0.327 | 38.573 | 4.450  |
| ATOM | 59   | H1   | CH3 | 8  | -0.652 | 37.550 | 4.610  |
| ATOM | 60   | H2   | CH3 | 8  | -1.148 | 39.250 | 4.661  |
| ATOM | 61   | H3   | CH3 | 8  | 0.504  | 38.796 | 5.112  |
| ATOM | 62   | C    | CH3 | 9  | -0.677 | 44.514 | 1.680  |
| ATOM | 63   | H1   | CH3 | 9  | -1.651 | 44.068 | 1.861  |
| ATOM | 64   | H2   | CH3 | 9  | -0.590 | 45.434 | 2.249  |
| ATOM | 65   | H3   | CH3 | 9  | 0.101  | 43.823 | 1.991  |
| ATOM | 66   | C    | CH3 | 10 | 4.300  | 43.936 | -4.270 |
| ATOM | 67   | H1   | CH3 | 10 | 4.012  | 44.912 | -4.651 |
| ATOM | 68   | H2   | CH3 | 10 | 3.435  | 43.452 | -3.828 |
| ATOM | 69   | H3   | CH3 | 10 | 4.678  | 43.327 | -5.085 |
| ATOM | 70   | C    | CH3 | 11 | -0.422 | 45.625 | -4.525 |
| ATOM | 71   | H1   | CH3 | 11 | -0.332 | 46.656 | -4.196 |
| ATOM | 72   | H2   | CH3 | 11 | -1.470 | 45.380 | -4.664 |
| ATOM | 73   | H3   | CH3 | 11 | 0.106  | 45.499 | -5.466 |

**Metal Site1 large model for RESP charges:**

|        |     |     |     |   |       |        |       |
|--------|-----|-----|-----|---|-------|--------|-------|
| REMARK |     |     |     |   |       |        |       |
| ATOM   | 615 | CH3 | ACE | 1 | 7.776 | 38.196 | 7.083 |
| ATOM   | 616 | C   | ACE | 1 | 6.562 | 38.865 | 6.446 |

|      |      |      |     |   |        |        |       |
|------|------|------|-----|---|--------|--------|-------|
| ATOM | 617  | O    | ACE | 1 | 5.436  | 38.697 | 6.905 |
| ATOM | 3582 | HH31 | ACE | 1 | 7.483  | 37.580 | 7.933 |
| ATOM | 3583 | HH32 | ACE | 1 | 8.264  | 37.574 | 6.333 |
| ATOM | 3584 | HH33 | ACE | 1 | 8.466  | 38.971 | 7.416 |
| ATOM | 623  | N    | HIF | 2 | 6.831  | 39.649 | 5.384 |
| ATOM | 624  | CA   | HIF | 2 | 5.710  | 40.317 | 4.720 |
| ATOM | 625  | C    | HIF | 2 | 4.658  | 39.317 | 4.259 |
| ATOM | 626  | O    | HIF | 2 | 3.458  | 39.467 | 4.490 |
| ATOM | 627  | CB   | HIF | 2 | 6.261  | 41.034 | 3.476 |
| ATOM | 628  | CG   | HIF | 2 | 5.188  | 41.773 | 2.727 |
| ATOM | 629  | ND1  | HIF | 2 | 4.801  | 43.044 | 3.085 |
| ATOM | 630  | CD2  | HIF | 2 | 4.441  | 41.427 | 1.654 |
| ATOM | 631  | CE1  | HIF | 2 | 3.847  | 43.454 | 2.266 |
| ATOM | 632  | NE2  | HIF | 2 | 3.621  | 42.494 | 1.389 |
| ATOM | 2413 | H    | HIF | 2 | 7.785  | 39.760 | 5.071 |
| ATOM | 2414 | HA   | HIF | 2 | 5.241  | 41.016 | 5.413 |
| ATOM | 2415 | HB2  | HIF | 2 | 7.021  | 41.755 | 3.778 |
| ATOM | 2416 | HB3  | HIF | 2 | 6.703  | 40.302 | 2.800 |
| ATOM | 2417 | HD1  | HIF | 2 | 5.178  | 43.586 | 3.849 |
| ATOM | 2418 | HE1  | HIF | 2 | 3.402  | 44.440 | 2.398 |
| ATOM | 2419 | HD2  | HIF | 2 | 4.390  | 40.533 | 1.032 |
| ATOM | 633  | N    | NME | 3 | 5.133  | 38.287 | 3.539 |
| ATOM | 634  | CH3  | NME | 3 | 4.207  | 37.337 | 2.913 |
| ATOM | 3585 | H    | NME | 3 | 6.130  | 38.168 | 3.430 |
| ATOM | 3586 | HH31 | NME | 3 | 4.354  | 37.344 | 1.833 |
| ATOM | 3587 | HH32 | NME | 3 | 4.397  | 36.335 | 3.299 |
| ATOM | 3588 | HH33 | NME | 3 | 3.181  | 37.625 | 3.141 |
| ATOM | 653  | CH3  | ACE | 4 | 1.836  | 38.348 | 7.562 |
| ATOM | 654  | C    | ACE | 4 | 0.588  | 38.471 | 6.689 |
| ATOM | 655  | O    | ACE | 4 | -0.549 | 38.374 | 7.178 |
| ATOM | 3589 | HH31 | ACE | 4 | 1.572  | 38.285 | 8.618 |
| ATOM | 3590 | HH32 | ACE | 4 | 2.379  | 37.450 | 7.268 |
| ATOM | 3591 | HH33 | ACE | 4 | 2.465  | 39.223 | 7.396 |
| ATOM | 657  | N    | GLF | 5 | 0.799  | 38.556 | 5.367 |
| ATOM | 658  | CA   | GLF | 5 | -0.328 | 38.561 | 4.441 |
| ATOM | 659  | C    | GLF | 5 | -1.171 | 37.293 | 4.557 |
| ATOM | 660  | O    | GLF | 5 | -2.398 | 37.412 | 4.566 |
| ATOM | 661  | CB   | GLF | 5 | 0.120  | 38.748 | 2.987 |
| ATOM | 662  | CG   | GLF | 5 | 0.586  | 40.176 | 2.719 |
| ATOM | 663  | CD   | GLF | 5 | 1.075  | 40.440 | 1.316 |
| ATOM | 664  | OE1  | GLF | 5 | 1.603  | 39.502 | 0.685 |
| ATOM | 665  | OE2  | GLF | 5 | 0.964  | 41.577 | 0.806 |
| ATOM | 2449 | H    | GLF | 5 | 1.743  | 38.617 | 5.012 |
| ATOM | 2450 | HA   | GLF | 5 | -0.970 | 39.416 | 4.654 |
| ATOM | 2451 | HB2  | GLF | 5 | 0.947  | 38.072 | 2.771 |
| ATOM | 2452 | HB3  | GLF | 5 | -0.712 | 38.528 | 2.319 |
| ATOM | 2453 | HG2  | GLF | 5 | -0.239 | 40.867 | 2.895 |
| ATOM | 2454 | HG3  | GLF | 5 | 1.413  | 40.420 | 3.386 |
| ATOM | 666  | N    | NME | 6 | -0.539 | 36.124 | 4.637 |
| ATOM | 667  | CH3  | NME | 6 | -1.273 | 34.862 | 4.794 |
| ATOM | 3592 | H    | NME | 6 | 0.469  | 36.094 | 4.590 |
| ATOM | 3593 | HH31 | NME | 6 | -1.056 | 34.208 | 3.950 |



|      |      |      |     |    |        |        |        |
|------|------|------|-----|----|--------|--------|--------|
| ATOM | 3594 | HH32 | NME | 6  | -0.965 | 34.375 | 5.719  |
| ATOM | 3595 | HH33 | NME | 6  | -2.343 | 35.066 | 4.830  |
| ATOM | 775  | CH3  | ACE | 7  | -3.620 | 43.182 | 3.653  |
| ATOM | 776  | C    | ACE | 7  | -2.223 | 43.694 | 3.299  |
| ATOM | 777  | O    | ACE | 7  | -1.350 | 43.680 | 4.160  |
| ATOM | 3596 | HH31 | ACE | 7  | -3.681 | 42.902 | 4.705  |
| ATOM | 3597 | HH32 | ACE | 7  | -4.343 | 43.970 | 3.444  |
| ATOM | 3598 | HH33 | ACE | 7  | -3.840 | 42.314 | 3.032  |
| ATOM | 781  | N    | HIM | 8  | -1.966 | 44.082 | 2.052  |
| ATOM | 782  | CA   | HIM | 8  | -0.623 | 44.536 | 1.689  |
| ATOM | 783  | C    | HIM | 8  | -0.178 | 45.731 | 2.516  |
| ATOM | 784  | O    | HIM | 8  | 0.967  | 45.699 | 3.027  |
| ATOM | 785  | CB   | HIM | 8  | -0.523 | 44.821 | 0.179  |
| ATOM | 786  | CG   | HIM | 8  | 0.820  | 45.444 | -0.116 |
| ATOM | 787  | ND1  | HIM | 8  | 1.967  | 44.704 | -0.160 |
| ATOM | 788  | CD2  | HIM | 8  | 1.155  | 46.741 | -0.348 |
| ATOM | 789  | CE1  | HIM | 8  | 2.985  | 45.518 | -0.417 |
| ATOM | 790  | NE2  | HIM | 8  | 2.512  | 46.756 | -0.539 |
| ATOM | 2575 | H    | HIM | 8  | -2.700 | 44.062 | 1.359  |
| ATOM | 2576 | HA   | HIM | 8  | 0.090  | 43.728 | 1.851  |
| ATOM | 2577 | HB2  | HIM | 8  | -0.624 | 43.888 | -0.375 |
| ATOM | 2578 | HB3  | HIM | 8  | -1.318 | 45.506 | -0.115 |
| ATOM | 2579 | HE1  | HIM | 8  | 3.997  | 45.119 | -0.492 |
| ATOM | 2580 | HE2  | HIM | 8  | 3.071  | 47.573 | -0.741 |
| ATOM | 2581 | HD2  | HIM | 8  | 0.587  | 47.670 | -0.402 |
| ATOM | 791  | N    | NME | 9  | -0.986 | 46.782 | 2.660  |
| ATOM | 792  | CH3  | NME | 9  | -0.511 | 47.937 | 3.432  |
| ATOM | 3599 | H    | NME | 9  | -1.905 | 46.770 | 2.241  |
| ATOM | 3600 | HH31 | NME | 9  | -0.503 | 48.822 | 2.796  |
| ATOM | 3601 | HH32 | NME | 9  | -1.175 | 48.106 | 4.280  |
| ATOM | 3602 | HH33 | NME | 9  | 0.498  | 47.742 | 3.794  |
| ATOM | 1330 | CH3  | ACE | 10 | 4.063  | 41.378 | -7.077 |
| ATOM | 1331 | C    | ACE | 10 | 3.759  | 42.597 | -6.227 |
| ATOM | 1332 | O    | ACE | 10 | 2.684  | 43.163 | -6.353 |
| ATOM | 3603 | HH31 | ACE | 10 | 3.288  | 41.219 | -7.826 |
| ATOM | 3604 | HH32 | ACE | 10 | 5.022  | 41.529 | -7.572 |
| ATOM | 3605 | HH33 | ACE | 10 | 4.124  | 40.506 | -6.426 |
| ATOM | 1336 | N    | GLM | 11 | 4.614  | 42.945 | -5.247 |
| ATOM | 1337 | CA   | GLM | 11 | 4.294  | 43.971 | -4.279 |
| ATOM | 1338 | C    | GLM | 11 | 3.974  | 45.337 | -4.876 |
| ATOM | 1339 | O    | GLM | 11 | 3.144  | 46.053 | -4.317 |
| ATOM | 1340 | CB   | GLM | 11 | 5.396  | 44.105 | -3.202 |
| ATOM | 1341 | CG   | GLM | 11 | 5.831  | 42.753 | -2.638 |
| ATOM | 1342 | CD   | GLM | 11 | 4.678  | 41.969 | -2.022 |
| ATOM | 1343 | OE1  | GLM | 11 | 3.643  | 42.572 | -1.668 |
| ATOM | 1344 | OE2  | GLM | 11 | 4.767  | 40.735 | -1.923 |
| ATOM | 3132 | H    | GLM | 11 | 5.509  | 42.483 | -5.175 |
| ATOM | 3133 | HA   | GLM | 11 | 3.420  | 43.668 | -3.703 |
| ATOM | 3134 | HB2  | GLM | 11 | 6.273  | 44.585 | -3.637 |
| ATOM | 3135 | HB3  | GLM | 11 | 5.024  | 44.709 | -2.375 |
| ATOM | 3136 | HG2  | GLM | 11 | 6.256  | 42.145 | -3.437 |
| ATOM | 3137 | HG3  | GLM | 11 | 6.580  | 42.907 | -1.861 |

|      |      |      |     |    |        |        |        |
|------|------|------|-----|----|--------|--------|--------|
| ATOM | 1345 | N    | NME | 12 | 4.609  | 45.735 | -5.969 |
| ATOM | 1346 | CH3  | NME | 12 | 4.352  | 47.043 | -6.564 |
| ATOM | 3606 | H    | NME | 12 | 5.287  | 45.126 | -6.406 |
| ATOM | 3607 | HH31 | NME | 12 | 5.274  | 47.624 | -6.577 |
| ATOM | 3608 | HH32 | NME | 12 | 3.990  | 46.914 | -7.584 |
| ATOM | 3609 | HH33 | NME | 12 | 3.600  | 47.569 | -5.976 |
| ATOM | 1356 | CH3  | ACE | 13 | 0.817  | 46.499 | -7.958 |
| ATOM | 1357 | C    | ACE | 13 | -0.077 | 46.485 | -6.742 |
| ATOM | 1358 | O    | ACE | 13 | -1.041 | 47.245 | -6.620 |
| ATOM | 3610 | HH31 | ACE | 13 | 0.390  | 47.112 | -8.752 |
| ATOM | 3611 | HH32 | ACE | 13 | 1.789  | 46.900 | -7.671 |
| ATOM | 3612 | HH33 | ACE | 13 | 0.937  | 45.476 | -8.314 |
| ATOM | 1362 | N    | GLC | 14 | 0.350  | 45.759 | -5.699 |
| ATOM | 1363 | CA   | GLC | 14 | -0.392 | 45.719 | -4.452 |
| ATOM | 1364 | C    | GLC | 14 | -0.340 | 47.079 | -3.763 |
| ATOM | 1365 | O    | GLC | 14 | -1.279 | 47.388 | -3.038 |
| ATOM | 1366 | CB   | GLC | 14 | 0.188  | 44.691 | -3.464 |
| ATOM | 1367 | CG   | GLC | 14 | 0.083  | 43.242 | -3.885 |
| ATOM | 1368 | CD   | GLC | 14 | 0.852  | 42.315 | -2.959 |
| ATOM | 1369 | OE1  | GLC | 14 | 0.810  | 42.457 | -1.747 |
| ATOM | 1370 | NE2  | GLC | 14 | 1.565  | 41.359 | -3.532 |
| ATOM | 3154 | H    | GLC | 14 | 1.205  | 45.226 | -5.775 |
| ATOM | 3155 | HA   | GLC | 14 | -1.432 | 45.462 | -4.655 |
| ATOM | 3156 | HB2  | GLC | 14 | 1.250  | 44.888 | -3.315 |
| ATOM | 3157 | HB3  | GLC | 14 | -0.333 | 44.769 | -2.510 |
| ATOM | 3158 | HG2  | GLC | 14 | -0.963 | 42.935 | -3.876 |
| ATOM | 3159 | HG3  | GLC | 14 | 0.487  | 43.125 | -4.891 |
| ATOM | 3160 | HE21 | GLC | 14 | 2.096  | 40.717 | -2.960 |
| ATOM | 3161 | HE22 | GLC | 14 | 1.575  | 41.275 | -4.538 |
| ATOM | 1371 | N    | NME | 15 | 0.717  | 47.853 | -3.960 |
| ATOM | 1372 | CH3  | NME | 15 | 0.916  | 49.144 | -3.312 |
| ATOM | 3613 | H    | NME | 15 | 1.446  | 47.556 | -4.593 |
| ATOM | 3614 | HH31 | NME | 15 | 1.832  | 49.118 | -2.722 |
| ATOM | 3615 | HH32 | NME | 15 | 0.995  | 49.923 | -4.070 |
| ATOM | 3616 | HH33 | NME | 15 | 0.070  | 49.357 | -2.659 |
| ATOM | 1779 | FE   | FE1 | 16 | 2.243  | 42.623 | -0.240 |

**Metal Site 2 sidechain model for force constants:**

| REMARK |      |     |     |   |        |        |       |
|--------|------|-----|-----|---|--------|--------|-------|
| ATOM   | 76   | CB  | MEF | 1 | 11.177 | 50.490 | 3.310 |
| ATOM   | 77   | CG  | MEF | 1 | 9.946  | 50.055 | 4.111 |
| ATOM   | 78   | SD  | MEF | 1 | 9.147  | 48.576 | 3.427 |
| ATOM   | 79   | CE  | MEF | 1 | 8.367  | 49.275 | 1.970 |
| ATOM   | 1847 | HB2 | MEF | 1 | 11.717 | 51.243 | 3.884 |
| ATOM   | 1848 | HB3 | MEF | 1 | 10.843 | 50.924 | 2.368 |
| ATOM   | 1849 | HG2 | MEF | 1 | 10.240 | 49.830 | 5.136 |
| ATOM   | 1850 | HG3 | MEF | 1 | 9.210  | 50.859 | 4.113 |
| ATOM   | 1851 | HE1 | MEF | 1 | 8.752  | 48.781 | 1.078 |
| ATOM   | 1852 | HE2 | MEF | 1 | 7.289  | 49.128 | 2.029 |
| ATOM   | 1853 | HE3 | MEF | 1 | 8.586  | 50.342 | 1.917 |
| ATOM   | 811  | CA  | CYF | 2 | 4.124  | 46.459 | 4.853 |

|      |      |     |     |    |        |        |        |
|------|------|-----|-----|----|--------|--------|--------|
| ATOM | 2599 | HA  | CYF | 2  | 4.923  | 45.846 | 4.435  |
| ATOM | 812  | C   | CYF | 2  | 4.623  | 47.092 | 6.162  |
| ATOM | 813  | O   | CYF | 2  | 5.797  | 47.442 | 6.269  |
| ATOM | 814  | CB  | CYF | 2  | 3.929  | 47.575 | 3.825  |
| ATOM | 2600 | HB2 | CYF | 2  | 3.407  | 47.180 | 2.954  |
| ATOM | 2601 | HB3 | CYF | 2  | 3.340  | 48.378 | 4.267  |
| ATOM | 815  | SG  | CYF | 2  | 5.511  | 48.287 | 3.256  |
| ATOM | 845  | CB  | GLT | 3  | 7.257  | 43.149 | 6.644  |
| ATOM | 846  | CG  | GLT | 3  | 7.641  | 44.601 | 6.305  |
| ATOM | 847  | CD  | GLT | 3  | 7.529  | 44.885 | 4.806  |
| ATOM | 848  | OE1 | GLT | 3  | 7.312  | 43.942 | 4.036  |
| ATOM | 849  | OE2 | GLT | 3  | 7.629  | 46.052 | 4.355  |
| ATOM | 2627 | HB2 | GLT | 3  | 8.060  | 42.497 | 6.301  |
| ATOM | 2628 | HB3 | GLT | 3  | 6.339  | 42.907 | 6.108  |
| ATOM | 2629 | HG2 | GLT | 3  | 6.977  | 45.286 | 6.833  |
| ATOM | 2630 | HG3 | GLT | 3  | 8.671  | 44.786 | 6.611  |
| ATOM | 854  | CB  | HIT | 4  | 9.345  | 46.755 | 9.979  |
| ATOM | 855  | CG  | HIT | 4  | 9.257  | 47.092 | 8.514  |
| ATOM | 856  | ND1 | HIT | 4  | 10.238 | 46.778 | 7.618  |
| ATOM | 857  | CD2 | HIT | 4  | 8.273  | 47.704 | 7.817  |
| ATOM | 858  | CE1 | HIT | 4  | 9.881  | 47.183 | 6.402  |
| ATOM | 859  | NE2 | HIT | 4  | 8.692  | 47.759 | 6.498  |
| ATOM | 2633 | HB2 | HIT | 4  | 8.495  | 47.200 | 10.496 |
| ATOM | 2634 | HB3 | HIT | 4  | 10.270 | 47.167 | 10.382 |
| ATOM | 2635 | HD1 | HIT | 4  | 11.108 | 46.310 | 7.830  |
| ATOM | 2636 | HE1 | HIT | 4  | 10.543 | 47.010 | 5.554  |
| ATOM | 2637 | HD2 | HIT | 4  | 7.305  | 48.117 | 8.099  |
| ATOM | 6963 | FE  | FE2 | 5  | 7.280  | 47.921 | 4.876  |
| ATOM | 7031 | O   | OH1 | 6  | 6.986  | 50.124 | 5.514  |
| ATOM | 3570 | H1  | OH1 | 6  | 6.135  | 50.147 | 5.951  |
| ATOM | 44   | C   | CH3 | 7  | 12.107 | 49.296 | 3.025  |
| ATOM | 45   | H1  | CH3 | 7  | 12.968 | 49.635 | 2.457  |
| ATOM | 46   | H2  | CH3 | 7  | 11.569 | 48.547 | 2.453  |
| ATOM | 47   | H3  | CH3 | 7  | 12.440 | 48.864 | 3.964  |
| ATOM | 48   | C   | CH3 | 8  | 7.044  | 42.968 | 8.158  |
| ATOM | 49   | H1  | CH3 | 8  | 6.775  | 41.937 | 8.366  |
| ATOM | 50   | H2  | CH3 | 8  | 6.247  | 43.624 | 8.493  |
| ATOM | 51   | H3  | CH3 | 8  | 7.961  | 43.216 | 8.685  |
| ATOM | 52   | C   | CH3 | 9  | 9.331  | 45.231 | 10.202 |
| ATOM | 53   | H1  | CH3 | 9  | 9.396  | 45.020 | 11.265 |
| ATOM | 54   | H2  | CH3 | 9  | 10.178 | 44.783 | 9.693  |
| ATOM | 55   | H3  | CH3 | 9  | 8.410  | 44.815 | 9.806  |
| ATOM | 56   | C   | CH3 | 10 | 2.834  | 45.638 | 5.036  |
| ATOM | 57   | H1  | CH3 | 10 | 3.003  | 44.856 | 5.770  |
| ATOM | 58   | H2  | CH3 | 10 | 2.552  | 45.191 | 4.089  |
| ATOM | 59   | H3  | CH3 | 10 | 2.036  | 46.290 | 5.379  |
| ATOM | 60   | C   | CH3 | 11 | 3.479  | 47.237 | 7.182  |
| ATOM | 61   | H1  | CH3 | 11 | 3.861  | 47.686 | 8.094  |
| ATOM | 62   | H2  | CH3 | 11 | 3.067  | 46.258 | 7.406  |
| ATOM | 63   | H3  | CH3 | 11 | 2.700  | 47.870 | 6.767  |

### Metal Site2 large model for RESP charges:

REMARK

|      |      |      |     |   |        |        |        |
|------|------|------|-----|---|--------|--------|--------|
| ATOM | 64   | CH3  | ACE | 1 | 14.361 | 47.494 | 5.544  |
| ATOM | 65   | C    | ACE | 1 | 13.495 | 47.805 | 4.335  |
| ATOM | 66   | O    | ACE | 1 | 13.500 | 46.974 | 3.419  |
| ATOM | 3581 | HH31 | ACE | 1 | 14.771 | 46.486 | 5.484  |
| ATOM | 3582 | HH32 | ACE | 1 | 15.176 | 48.216 | 5.583  |
| ATOM | 3583 | HH33 | ACE | 1 | 13.751 | 47.586 | 6.443  |
| ATOM | 72   | N    | MEF | 2 | 12.901 | 48.990 | 4.218  |
| ATOM | 73   | CA   | MEF | 2 | 12.104 | 49.299 | 3.026  |
| ATOM | 74   | C    | MEF | 2 | 12.910 | 49.485 | 1.762  |
| ATOM | 75   | O    | MEF | 2 | 12.625 | 49.106 | 0.627  |
| ATOM | 76   | CB   | MEF | 2 | 11.177 | 50.490 | 3.310  |
| ATOM | 77   | CG   | MEF | 2 | 9.946  | 50.055 | 4.111  |
| ATOM | 78   | SD   | MEF | 2 | 9.147  | 48.576 | 3.427  |
| ATOM | 79   | CE   | MEF | 2 | 8.367  | 49.275 | 1.970  |
| ATOM | 1845 | H    | MEF | 2 | 13.001 | 49.676 | 4.952  |
| ATOM | 1846 | HA   | MEF | 2 | 11.403 | 48.486 | 2.837  |
| ATOM | 1847 | HB2  | MEF | 2 | 11.717 | 51.243 | 3.884  |
| ATOM | 1848 | HB3  | MEF | 2 | 10.843 | 50.924 | 2.368  |
| ATOM | 1849 | HG2  | MEF | 2 | 10.240 | 49.830 | 5.136  |
| ATOM | 1850 | HG3  | MEF | 2 | 9.210  | 50.859 | 4.113  |
| ATOM | 1851 | HE1  | MEF | 2 | 8.752  | 48.781 | 1.078  |
| ATOM | 1852 | HE2  | MEF | 2 | 7.289  | 49.128 | 2.029  |
| ATOM | 1853 | HE3  | MEF | 2 | 8.586  | 50.342 | 1.917  |
| ATOM | 80   | N    | NME | 3 | 14.159 | 49.967 | 1.956  |
| ATOM | 81   | CH3  | NME | 3 | 15.179 | 50.159 | 0.934  |
| ATOM | 3584 | H    | NME | 3 | 14.456 | 50.232 | 2.884  |
| ATOM | 3585 | HH31 | NME | 3 | 15.460 | 51.211 | 0.893  |
| ATOM | 3586 | HH32 | NME | 3 | 16.056 | 49.559 | 1.178  |
| ATOM | 3587 | HH33 | NME | 3 | 14.786 | 49.850 | -0.035 |
| ATOM | 806  | CH3  | ACE | 4 | 1.772  | 43.705 | 6.099  |
| ATOM | 807  | C    | ACE | 4 | 3.026  | 44.516 | 5.828  |
| ATOM | 808  | O    | ACE | 4 | 4.097  | 44.172 | 6.343  |
| ATOM | 3588 | HH31 | ACE | 4 | 1.994  | 42.831 | 6.712  |
| ATOM | 3589 | HH32 | ACE | 4 | 1.052  | 44.339 | 6.617  |
| ATOM | 3590 | HH33 | ACE | 4 | 1.352  | 43.383 | 5.146  |
| ATOM | 810  | N    | CYF | 5 | 2.946  | 45.630 | 5.088  |
| ATOM | 811  | CA   | CYF | 5 | 4.124  | 46.459 | 4.853  |
| ATOM | 812  | C    | CYF | 5 | 4.623  | 47.092 | 6.162  |
| ATOM | 813  | O    | CYF | 5 | 5.797  | 47.442 | 6.269  |
| ATOM | 814  | CB   | CYF | 5 | 3.929  | 47.575 | 3.825  |
| ATOM | 815  | SG   | CYF | 5 | 5.511  | 48.287 | 3.256  |
| ATOM | 2598 | H    | CYF | 5 | 2.061  | 45.903 | 4.686  |
| ATOM | 2599 | HA   | CYF | 5 | 4.923  | 45.846 | 4.435  |
| ATOM | 2600 | HB2  | CYF | 5 | 3.407  | 47.180 | 2.954  |
| ATOM | 2601 | HB3  | CYF | 5 | 3.340  | 48.378 | 4.267  |
| ATOM | 816  | N    | NME | 6 | 3.750  | 47.279 | 7.133  |
| ATOM | 817  | CH3  | NME | 6 | 4.114  | 47.706 | 8.467  |
| ATOM | 3591 | H    | NME | 6 | 2.767  | 47.122 | 6.961  |
| ATOM | 3592 | HH31 | NME | 6 | 3.620  | 48.651 | 8.694  |

|      |      |      |     |    |        |        |        |
|------|------|------|-----|----|--------|--------|--------|
| ATOM | 3593 | HH32 | NME | 6  | 3.802  | 46.951 | 9.189  |
| ATOM | 3594 | HH33 | NME | 6  | 5.194  | 47.838 | 8.525  |
| ATOM | 828  | CH3  | ACE | 7  | 4.048  | 44.238 | 10.128 |
| ATOM | 829  | C    | ACE | 7  | 5.363  | 43.553 | 9.821  |
| ATOM | 830  | O    | ACE | 7  | 6.046  | 43.050 | 10.732 |
| ATOM | 3595 | HH31 | ACE | 7  | 3.788  | 44.134 | 11.181 |
| ATOM | 3596 | HH32 | ACE | 7  | 4.139  | 45.295 | 9.878  |
| ATOM | 3597 | HH33 | ACE | 7  | 3.268  | 43.786 | 9.514  |
| ATOM | 841  | N    | GLT | 8  | 5.795  | 43.609 | 8.555  |
| ATOM | 842  | CA   | GLT | 8  | 7.037  | 42.942 | 8.166  |
| ATOM | 843  | C    | GLT | 8  | 8.240  | 43.444 | 8.935  |
| ATOM | 844  | O    | GLT | 8  | 9.264  | 42.762 | 8.952  |
| ATOM | 845  | CB   | GLT | 8  | 7.257  | 43.149 | 6.644  |
| ATOM | 846  | CG   | GLT | 8  | 7.641  | 44.601 | 6.305  |
| ATOM | 847  | CD   | GLT | 8  | 7.529  | 44.885 | 4.806  |
| ATOM | 848  | OE1  | GLT | 8  | 7.312  | 43.942 | 4.036  |
| ATOM | 849  | OE2  | GLT | 8  | 7.629  | 46.052 | 4.355  |
| ATOM | 2625 | H    | GLT | 8  | 5.260  | 44.115 | 7.864  |
| ATOM | 2626 | HA   | GLT | 8  | 6.948  | 41.871 | 8.350  |
| ATOM | 2627 | HB2  | GLT | 8  | 8.060  | 42.497 | 6.301  |
| ATOM | 2628 | HB3  | GLT | 8  | 6.339  | 42.907 | 6.108  |
| ATOM | 2629 | HG2  | GLT | 8  | 6.977  | 45.286 | 6.833  |
| ATOM | 2630 | HG3  | GLT | 8  | 8.671  | 44.786 | 6.611  |
| ATOM | 850  | N    | HIT | 9  | 8.185  | 44.666 | 9.490  |
| ATOM | 851  | CA   | HIT | 9  | 9.330  | 45.220 | 10.185 |
| ATOM | 852  | C    | HIT | 9  | 9.373  | 44.928 | 11.676 |
| ATOM | 853  | O    | HIT | 9  | 10.336 | 45.355 | 12.342 |
| ATOM | 854  | CB   | HIT | 9  | 9.345  | 46.755 | 9.979  |
| ATOM | 855  | CG   | HIT | 9  | 9.257  | 47.092 | 8.514  |
| ATOM | 856  | ND1  | HIT | 9  | 10.238 | 46.778 | 7.618  |
| ATOM | 857  | CD2  | HIT | 9  | 8.273  | 47.704 | 7.817  |
| ATOM | 858  | CE1  | HIT | 9  | 9.881  | 47.183 | 6.402  |
| ATOM | 859  | NE2  | HIT | 9  | 8.692  | 47.759 | 6.498  |
| ATOM | 2631 | H    | HIT | 9  | 7.336  | 45.209 | 9.424  |
| ATOM | 2632 | HA   | HIT | 9  | 10.247 | 44.812 | 9.759  |
| ATOM | 2633 | HB2  | HIT | 9  | 8.495  | 47.200 | 10.496 |
| ATOM | 2634 | HB3  | HIT | 9  | 10.270 | 47.167 | 10.382 |
| ATOM | 2635 | HD1  | HIT | 9  | 11.108 | 46.310 | 7.830  |
| ATOM | 2636 | HE1  | HIT | 9  | 10.543 | 47.010 | 5.554  |
| ATOM | 2637 | HD2  | HIT | 9  | 7.305  | 48.117 | 8.099  |
| ATOM | 860  | N    | NME | 10 | 8.315  | 44.344 | 12.229 |
| ATOM | 861  | CH3  | NME | 10 | 8.275  | 44.116 | 13.671 |
| ATOM | 3598 | H    | NME | 10 | 7.539  | 44.058 | 11.649 |
| ATOM | 3599 | HH31 | NME | 10 | 7.422  | 44.643 | 14.099 |
| ATOM | 3600 | HH32 | NME | 10 | 8.178  | 43.048 | 13.868 |
| ATOM | 3601 | HH33 | NME | 10 | 9.195  | 44.486 | 14.124 |
| ATOM | 6963 | FE   | FE2 | 11 | 7.280  | 47.921 | 4.876  |
| ATOM | 7031 | O    | OH1 | 12 | 6.986  | 50.124 | 5.514  |
| ATOM | 3570 | H1   | OH1 | 12 | 6.549  | 50.789 | 4.981  |
